# Supplementary material for: Simulation of the Impact of Rangeland Management Strategies on Soil Health, Environmental Footprint, Economic Impact, and Human-Edible Nutrient Conversion from Grasslands in the Central and Northern Great Plains of the United States
Source: MDPI journal article supplement (doi:10.3390/su151612456), 2023-08-16
Supplement: s1 [file s1]

## Supplemental Data from APEX model

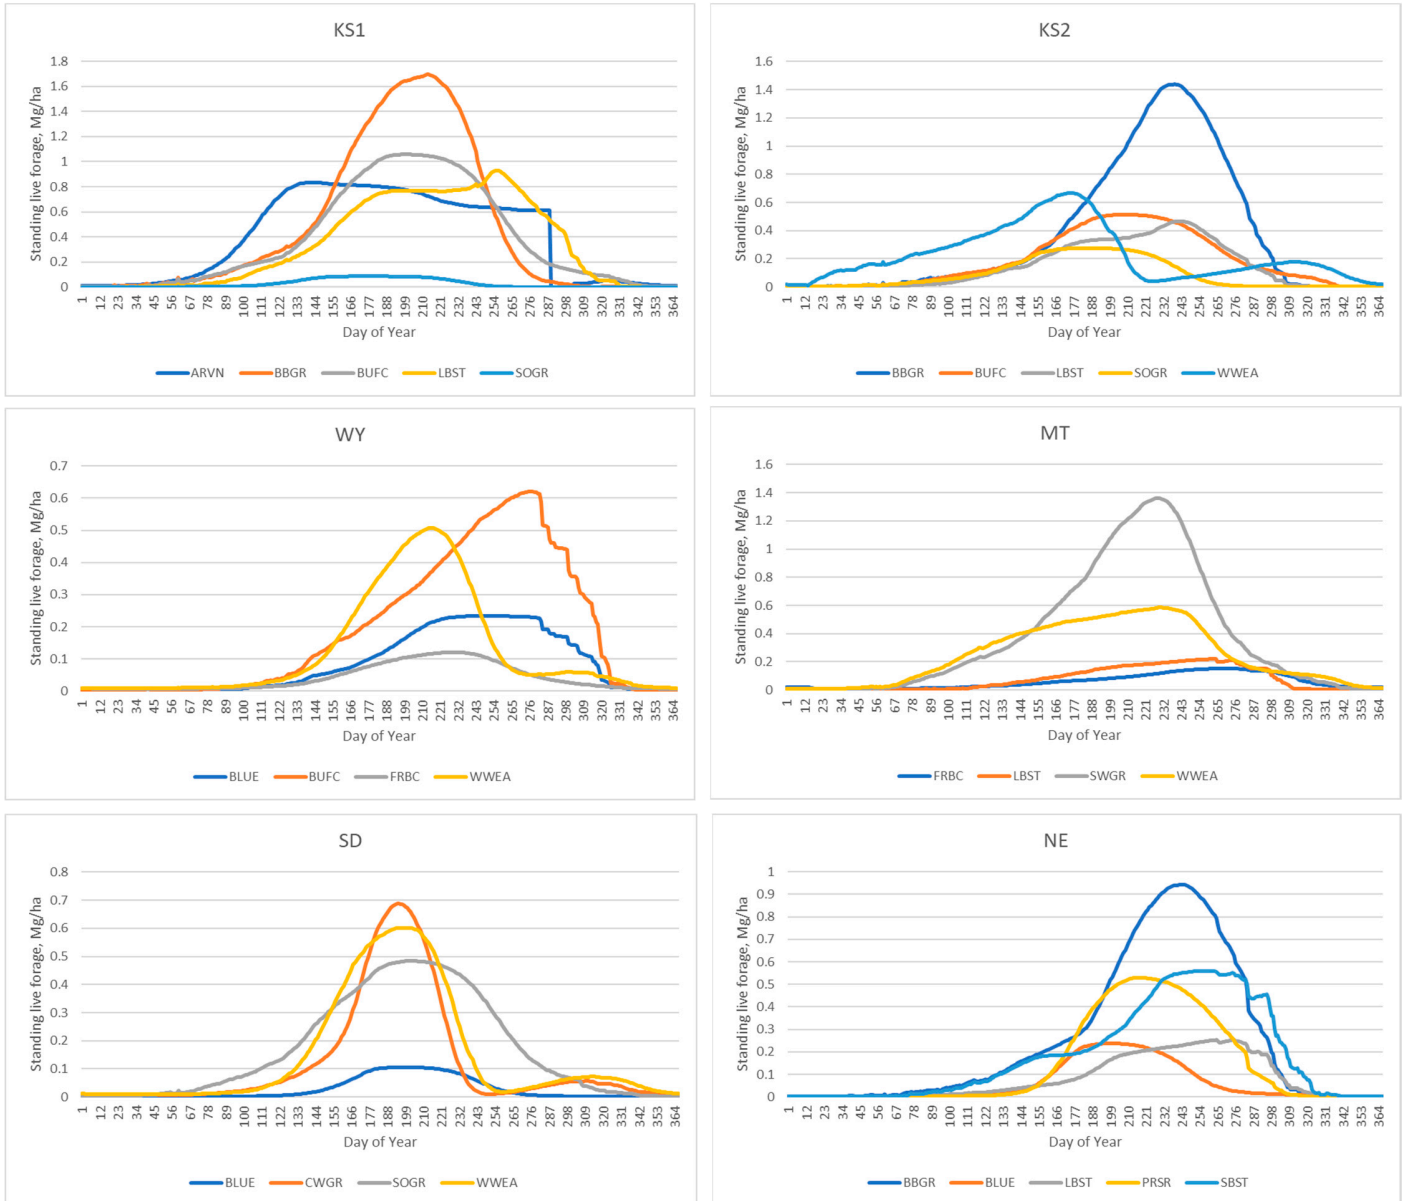

Figure S1. Daily standing live forage for each forage species at each study site for the no management scenario. KS1 = Konza Prairie Biological Station, Manhattan, KS; KS2 = Kansas State University Research and Education Center, Hays, KS; WY = USDA Agricultural Research Service High Plains Grasslands Research Station, Cheyenne, WY; MT = USDA Agricultural Research Service Livestock and Range Research Laboratory, Miles City, MT; SD = South Dakota State University Cottonwood Range and Livestock Field Station, Philip, SD; NE = University of Nebraska Gudmundsen Sandhills Laboratory, Whitman, NE. ARVN = Japanese brome (*Bromus japonicus*); BBGR = big bluestem (*Andropogon gerardii*); BLUE = blue grama

(*Bouteloua gracilis*); BUFC = buffalograss (*Bouteloua dactyloides*); CWGR = crested wheatgrass (*Agropyron cristatum*); FRBC = generic forb; LBST = little bluestem (*Schizachyrium scoparium*); PRSR = prairie sandreed (*Calamovilfa longifolia*); SBST = sand bluestem (*Andropogon hallii*); SOGR = sideoats grama (*Bouteloua curtipendula*); SWGR = slender wheatgrass (*Elymus trachycaulus*); WWEA = western wheatgrass (*Pascopyrum smithii*)

**Table S1.** Soil loss from water and wind among rangeland management scenarios at each site from the APEX model

| Item                          | No Mgmt | No Burn    |      |      |            |      |      | Spring Burn |      |       |            |      |       |
|-------------------------------|---------|------------|------|------|------------|------|------|-------------|------|-------|------------|------|-------|
|                               |         | Continuous |      |      | Rotational |      |      | Continuous  |      |       | Rotational |      |       |
|                               |         | Low        | Mod  | High | Low        | Mod  | High | Low         | Mod  | High  | Low        | Mod  | High  |
| <b>Water erosion, t/ha/yr</b> |         |            |      |      |            |      |      |             |      |       |            |      |       |
| KS1                           | 5.42    | 5.73       | 6.02 | 7.36 | 6.50       | 6.81 | 7.94 | 8.44        | 8.61 | 10.29 | 9.49       | 9.82 | 11.27 |
| KS2                           | 0.78    | 1.07       | 1.26 | 1.83 | 1.30       | 1.45 | 1.89 | 1.08        | 1.28 | 1.83  | 1.30       | 1.47 | 3.55  |
| WY                            | 1.83    | 1.90       | 2.12 | 2.49 | 1.92       | 1.99 | 2.16 | 3.32        | 3.52 | 3.62  | 3.55       | 3.64 | 2.15  |
| MT                            | 0.56    | 0.48       | 0.48 | 0.49 | 0.53       | 0.52 | 0.51 | 1.12        | 1.11 | 1.12  | 1.21       | 1.19 | 1.18  |
| SD                            | 1.49    | 1.65       | 1.58 | 1.68 | 1.80       | 1.75 | 1.80 | 2.32        | 2.34 | 2.42  | 2.61       | 2.60 | 2.66  |
| NE                            | 0.05    | 0.05       | 0.05 | 0.05 | 0.09       | 0.09 | 0.09 | 0.12        | 0.12 | 0.12  | 0.15       | 0.15 | 0.14  |
| <b>Wind erosion, t/ha/yr</b>  |         |            |      |      |            |      |      |             |      |       |            |      |       |
| KS1                           | 4.67    | 4.28       | 4.16 | 4.17 | 2.72       | 2.74 | 2.76 | 4.24        | 4.20 | 3.98  | 2.77       | 2.78 | 2.81  |
| KS2                           | 0.16    | 0.16       | 0.16 | 0.16 | 0.17       | 0.17 | 0.17 | 0.16        | 0.16 | 0.16  | 0.17       | 0.17 | 0.17  |
| WY                            | 0.58    | 0.59       | 0.59 | 0.59 | 0.32       | 0.32 | 0.32 | 0.59        | 0.59 | 0.59  | 0.32       | 0.32 | 0.32  |
| MT                            | 0.03    | 0.03       | 0.03 | 0.03 | 0.03       | 0.03 | 0.03 | 0.12        | 0.04 | 0.04  | 0.07       | 0.06 | 0.07  |
| SD                            | 0.04    | 0.04       | 0.04 | 0.04 | 0.07       | 0.07 | 0.07 | 0.05        | 0.05 | 0.05  | 0.07       | 0.07 | 0.07  |
| NE                            | 0.34    | 0.34       | 0.35 | 0.35 | 0.24       | 0.24 | 0.24 | 0.35        | 0.35 | 0.35  | 0.25       | 0.25 | 0.25  |

KS1 = Konza Prairie Biological Station, Manhattan, KS; KS2 = Kansas State University Research and Education Center, Hays, KS; WY = USDA Agricultural Research Service High Plains Grasslands Research Station, Cheyenne, WY; MT = USDA Agricultural Research Service Livestock and Range Research Laboratory, Miles City, MT; SD = South Dakota State University Cottonwood Range and Livestock Field Station, Philip, SD; NE = University of Nebraska Gudmundsen Sandhills Laboratory, Whitman, NE.

**Table S2.** Nitrogen losses among rangeland management scenarios at each site from the APEX model

| Item                            | No Burn |            |      |      |            |      |      |  | Spring Burn |      |      |            |      |      |
|---------------------------------|---------|------------|------|------|------------|------|------|--|-------------|------|------|------------|------|------|
|                                 | No Mgmt | Continuous |      |      | Rotational |      |      |  | Continuous  |      |      | Rotational |      |      |
|                                 |         | Low        | Mod  | High | Low        | Mod  | High |  | Low         | Mod  | High | Low        | Mod  | High |
| <b>Surface runoff, kg/ha/yr</b> |         |            |      |      |            |      |      |  |             |      |      |            |      |      |
| KS1                             | 3.5     | 4.7        | 5.3  | 6.6  | 4.9        | 5.4  | 7.1  |  | 3.5         | 4.1  | 5.7  | 3.7        | 4.3  | 6.1  |
| KS2                             | 1.0     | 1.3        | 1.4  | 1.8  | 1.3        | 1.5  | 1.9  |  | 1.3         | 1.4  | 1.8  | 1.3        | 1.5  | 1.2  |
| WY                              | 0.4     | 0.5        | 0.7  | 1.2  | 0.5        | 0.9  | 1.3  |  | 0.4         | 0.5  | 0.7  | 0.4        | 0.6  | 1.3  |
| MT                              | 0.4     | 0.5        | 0.6  | 0.7  | 0.5        | 0.6  | 0.7  |  | 0.5         | 0.5  | 0.6  | 0.4        | 0.5  | 0.7  |
| SD                              | 0.4     | 0.6        | 1.0  | 1.4  | 0.6        | 0.9  | 1.4  |  | 0.8         | 1.0  | 1.4  | 0.7        | 1.0  | 1.5  |
| NE                              | 0.1     | 0.1        | 0.1  | 0.1  | 0.1        | 0.1  | 0.1  |  | 0.1         | 0.1  | 0.1  | 0.1        | 0.1  | 0.1  |
| <b>Percolation, kg/ha/yr</b>    |         |            |      |      |            |      |      |  |             |      |      |            |      |      |
| KS1                             | 0.6     | 0.8        | 0.8  | 0.9  | 0.8        | 0.8  | 0.9  |  | 0.7         | 0.6  | 0.7  | 0.7        | 0.7  | 0.8  |
| KS2                             | 0.0     | 0.0        | 0.0  | 0.0  | 0.0        | 0.0  | 0.0  |  | 0.0         | 0.0  | 0.0  | 0.0        | 0.0  | 0.0  |
| WY                              | 0.2     | 0.3        | 1.1  | 1.9  | 0.3        | 1.0  | 1.6  |  | 0.1         | 0.4  | 1.1  | 0.1        | 0.5  | 1.7  |
| MT                              | 0.0     | 0.0        | 0.0  | 0.0  | 0.0        | 0.0  | 0.0  |  | 0.0         | 0.0  | 0.0  | 0.0        | 0.0  | 0.0  |
| SD                              | 0.4     | 0.4        | 0.4  | 0.4  | 0.4        | 0.4  | 0.4  |  | 0.4         | 0.4  | 0.4  | 0.4        | 0.4  | 0.4  |
| NE                              | 0.8     | 0.9        | 0.9  | 1.0  | 0.9        | 0.9  | 1.0  |  | 0.8         | 0.8  | 0.9  | 0.8        | 0.8  | 0.9  |
| <b>Sediment, kg/ha/yr</b>       |         |            |      |      |            |      |      |  |             |      |      |            |      |      |
| KS1                             | 7.7     | 9.7        | 10.9 | 14.7 | 11.8       | 12.9 | 16.5 |  | 11.9        | 12.9 | 17.0 | 14.5       | 15.7 | 19.6 |
| KS2                             | 0.7     | 1.5        | 1.9  | 2.9  | 1.7        | 2.1  | 3.0  |  | 1.5         | 1.9  | 2.9  | 1.7        | 2.1  | 4.4  |
| WY                              | 0.3     | 0.5        | 0.8  | 1.2  | 0.5        | 1.0  | 1.4  |  | 0.5         | 0.6  | 0.9  | 0.5        | 0.8  | 1.4  |
| MT                              | 0.2     | 0.8        | 0.9  | 1.2  | 0.8        | 0.9  | 1.2  |  | 0.8         | 1.0  | 1.3  | 0.9        | 1.0  | 1.2  |
| SD                              | 0.3     | 0.8        | 1.1  | 1.4  | 0.8        | 1.1  | 1.5  |  | 0.9         | 1.2  | 1.6  | 0.9        | 1.2  | 1.6  |
| NE                              | 0.0     | 0.2        | 0.3  | 0.5  | 0.2        | 0.2  | 0.5  |  | 0.3         | 0.4  | 0.7  | 0.2        | 0.4  | 0.6  |
| <b>Wind, kg/ha/yr</b>           |         |            |      |      |            |      |      |  |             |      |      |            |      |      |
| KS1                             | 8.1     | 7.4        | 7.2  | 7.0  | 4.8        | 4.8  | 4.7  |  | 6.7         | 6.6  | 6.3  | 4.5        | 4.5  | 4.4  |
| KS2                             | 0.2     | 0.2        | 0.2  | 0.2  | 0.2        | 0.2  | 0.2  |  | 0.2         | 0.2  | 0.2  | 0.2        | 0.2  | 0.2  |
| WY                              | 0.1     | 0.1        | 0.1  | 0.1  | 0.1        | 0.1  | 0.1  |  | 0.1         | 0.1  | 0.1  | 0.1        | 0.1  | 0.1  |
| MT                              | 0.0     | 0.0        | 0.0  | 0.0  | 0.0        | 0.0  | 0.0  |  | 0.0         | 0.0  | 0.0  | 0.0        | 0.0  | 0.0  |
| SD                              | 0.0     | 0.0        | 0.0  | 0.0  | 0.0        | 0.0  | 0.0  |  | 0.0         | 0.0  | 0.0  | 0.0        | 0.0  | 0.0  |
| NE                              | 0.0     | 0.0        | 0.0  | 0.0  | 0.0        | 0.0  | 0.0  |  | 0.0         | 0.0  | 0.0  | 0.0        | 0.0  | 0.0  |
| <b>Volatilization, kg/ha/yr</b> |         |            |      |      |            |      |      |  |             |      |      |            |      |      |
| KS1                             | 3.4     | 4.2        | 4.3  | 4.5  | 3.8        | 3.8  | 3.6  |  | 3.7         | 3.9  | 4.3  | 3.3        | 3.3  | 3.2  |
| KS2                             | 2.3     | 2.8        | 2.9  | 3.1  | 2.4        | 2.4  | 2.3  |  | 2.8         | 2.9  | 3.1  | 2.4        | 2.4  | 1.8  |
| WY                              | 0.5     | 0.8        | 1.1  | 1.4  | 0.7        | 0.7  | 0.7  |  | 0.5         | 0.7  | 0.9  | 0.5        | 0.4  | 0.7  |
| MT                              | 0.6     | 1.1        | 1.2  | 1.4  | 1.0        | 0.9  | 1.0  |  | 0.9         | 1.0  | 1.1  | 0.8        | 0.8  | 0.8  |
| SD                              | 0.3     | 0.6        | 0.9  | 1.1  | 0.5        | 0.8  | 0.8  |  | 0.9         | 1.0  | 1.1  | 0.7        | 0.9  | 0.9  |
| NE                              | 0.7     | 1.1        | 1.2  | 1.5  | 1.0        | 1.1  | 1.2  |  | 0.6         | 0.7  | 0.9  | 0.6        | 0.6  | 0.7  |

---

KS1 = Konza Prairie Biological Station, Manhattan, KS; KS2 = Kansas State University Research and Education Center, Hays, KS; WY = USDA Agricultural Research Service High Plains Grasslands Research Station, Cheyenne, WY; MT = USDA Agricultural Research Service Livestock and Range Research Laboratory, Miles City, MT; SD = South Dakota State University Cottonwood Range and Livestock Field Station, Philip, SD; NE = University of Nebraska Gudmundsen Sandhills Laboratory, Whitman, NE.

**Table S3.** Phosphorus losses among rangeland management scenarios at each site from the APEX model

| Item                            | No Mgmt | No Burn    |     |      |            |     |      | Spring Burn |     |      |            |     |      |
|---------------------------------|---------|------------|-----|------|------------|-----|------|-------------|-----|------|------------|-----|------|
|                                 |         | Continuous |     |      | Rotational |     |      | Continuous  |     |      | Rotational |     |      |
|                                 |         | Low        | Mod | High | Low        | Mod | High | Low         | Mod | High | Low        | Mod | High |
| <b>Surface runoff, kg/ha/yr</b> |         |            |     |      |            |     |      |             |     |      |            |     |      |
| KS1                             | 0.2     | 0.3        | 0.3 | 0.4  | 0.3        | 0.3 | 0.4  | 0.3         | 0.3 | 0.4  | 0.3        | 0.3 | 0.4  |
| KS2                             | 0.0     | 0.1        | 0.1 | 0.1  | 0.1        | 0.1 | 0.1  | 0.1         | 0.1 | 0.1  | 0.1        | 0.1 | 0.1  |
| WY                              | 0.0     | 0.0        | 0.0 | 0.1  | 0.0        | 0.0 | 0.1  | 0.0         | 0.0 | 0.1  | 0.0        | 0.0 | 0.1  |
| MT                              | 0.0     | 0.0        | 0.0 | 0.0  | 0.0        | 0.0 | 0.0  | 0.0         | 0.0 | 0.0  | 0.0        | 0.0 | 0.0  |
| SD                              | 0.0     | 0.0        | 0.0 | 0.0  | 0.0        | 0.0 | 0.0  | 0.0         | 0.0 | 0.0  | 0.0        | 0.0 | 0.0  |
| NE                              | 0.0     | 0.0        | 0.0 | 0.0  | 0.0        | 0.0 | 0.0  | 0.0         | 0.0 | 0.0  | 0.0        | 0.0 | 0.0  |
| <b>Percolation, kg/ha/yr</b>    |         |            |     |      |            |     |      |             |     |      |            |     |      |
| KS1                             | 0.1     | 0.1        | 0.1 | 0.1  | 0.1        | 0.1 | 0.1  | 0.1         | 0.1 | 0.1  | 0.1        | 0.1 | 0.1  |
| KS2                             | 0.0     | 0.0        | 0.0 | 0.0  | 0.0        | 0.0 | 0.0  | 0.0         | 0.0 | 0.0  | 0.0        | 0.0 | 0.0  |
| WY                              | 1.1     | 1.3        | 1.4 | 1.5  | 1.2        | 1.3 | 1.3  | 1.4         | 1.6 | 1.7  | 1.3        | 1.4 | 1.3  |
| MT                              | 0.0     | 0.0        | 0.0 | 0.0  | 0.0        | 0.0 | 0.0  | 0.0         | 0.0 | 0.0  | 0.0        | 0.0 | 0.0  |
| SD                              | 0.0     | 0.0        | 0.0 | 0.0  | 0.0        | 0.0 | 0.0  | 0.0         | 0.0 | 0.0  | 0.0        | 0.0 | 0.0  |
| NE                              | 5.6     | 5.6        | 5.7 | 6.1  | 5.7        | 5.8 | 6.0  | 5.7         | 5.8 | 6.3  | 5.7        | 5.8 | 6.2  |
| <b>Sediment, kg/ha/yr</b>       |         |            |     |      |            |     |      |             |     |      |            |     |      |
| KS1                             | 1.1     | 2.7        | 3.6 | 5.9  | 3.0        | 3.8 | 6.0  | 3.1         | 3.9 | 6.3  | 3.5        | 4.3 | 6.6  |
| KS2                             | 0.1     | 1.4        | 1.8 | 2.9  | 1.4        | 1.8 | 2.9  | 1.4         | 1.8 | 2.9  | 1.4        | 1.9 | 2.8  |
| WY                              | 0.1     | 0.4        | 1.2 | 2.0  | 0.4        | 1.4 | 2.3  | 0.4         | 0.7 | 1.4  | 0.4        | 1.1 | 2.3  |
| MT                              | 0.0     | 1.2        | 1.4 | 1.8  | 1.2        | 1.5 | 1.9  | 0.7         | 0.9 | 1.1  | 0.8        | 0.9 | 1.2  |
| SD                              | 0.1     | 0.6        | 1.0 | 1.5  | 0.7        | 1.0 | 1.5  | 0.6         | 0.8 | 1.3  | 0.6        | 0.9 | 1.3  |
| NE                              | 0.0     | 0.2        | 0.2 | 0.5  | 0.2        | 0.2 | 0.4  | 0.2         | 0.2 | 0.4  | 0.1        | 0.2 | 0.3  |
| <b>Wind, kg/ha/yr</b>           |         |            |     |      |            |     |      |             |     |      |            |     |      |
| KS1                             | 0.7     | 0.6        | 0.6 | 0.6  | 0.2        | 0.2 | 0.2  | 0.6         | 0.6 | 0.5  | 0.2        | 0.2 | 0.2  |
| KS2                             | 0.0     | 0.0        | 0.0 | 0.0  | 0.0        | 0.0 | 0.0  | 0.0         | 0.0 | 0.0  | 0.0        | 0.0 | 0.0  |
| WY                              | 0.0     | 0.0        | 0.0 | 0.0  | 0.0        | 0.0 | 0.0  | 0.0         | 0.0 | 0.0  | 0.0        | 0.0 | 0.0  |
| MT                              | 0.0     | 0.0        | 0.0 | 0.0  | 0.0        | 0.0 | 0.0  | 0.0         | 0.0 | 0.0  | 0.0        | 0.0 | 0.0  |
| SD                              | 0.0     | 0.0        | 0.0 | 0.0  | 0.0        | 0.0 | 0.0  | 0.0         | 0.0 | 0.0  | 0.0        | 0.0 | 0.0  |
| NE                              | 0.0     | 0.0        | 0.0 | 0.0  | 0.0        | 0.0 | 0.0  | 0.0         | 0.0 | 0.0  | 0.0        | 0.0 | 0.0  |

KS1 = Konza Prairie Biological Station, Manhattan, KS; KS2 = Kansas State University Research and Education Center, Hays, KS; WY = USDA Agricultural Research Service High Plains Grasslands Research Station, Cheyenne, WY; MT = USDA Agricultural Research Service Livestock and Range Research Laboratory, Miles City, MT; SD = South Dakota State University Cottonwood Range and Livestock Field Station, Philip, SD; NE = University of Nebraska Gudmundsen Sandhills Laboratory, Whitman, NE.

**Table S4.** Change in soil organic carbon pools among rangeland management scenarios at each site from the APEX model

| Item                           | No Burn |            |       |       |            |       |       | Spring Burn |       |       |            |       |       |
|--------------------------------|---------|------------|-------|-------|------------|-------|-------|-------------|-------|-------|------------|-------|-------|
|                                | No Mgmt | Continuous |       |       | Rotational |       |       | Continuous  |       |       | Rotational |       |       |
|                                |         | Low        | Mod   | High  | Low        | Mod   | High  | Low         | Mod   | High  | Low        | Mod   | High  |
| <b>Slow humus, Mg/ha/yr</b>    |         |            |       |       |            |       |       |             |       |       |            |       |       |
| KS1                            | -6.6    | -6.5       | -6.7  | -8.1  | -6.5       | -6.7  | -7.8  | -12.8       | -12.8 | -13.8 | -13.1      | -13.0 | -13.8 |
| KS2                            | +6.5    | +7.0       | +7.3  | +7.2  | +7.1       | +7.2  | +7.3  | +6.9        | +7.2  | +7.2  | +7.1       | +7.1  | +0.7  |
| WY                             | -9.0    | -8.8       | -8.2  | -8.4  | -8.6       | -7.7  | -7.7  | -11.0       | -10.8 | -10.6 | -10.9      | -10.5 | -7.7  |
| MT                             | -0.8    | 0.8        | 1.2   | 1.8   | 0.6        | 1.0   | 1.7   | -4.5        | -4.2  | -3.8  | -4.6       | -4.3  | -3.9  |
| SD                             | -21.5   | -23.9      | -28.5 | -28.7 | -20.3      | -25.5 | -28.0 | -31.5       | -31.8 | -32.0 | -25.5      | -31.3 | -31.4 |
| NE                             | -22.9   | -21.1      | -20.3 | -18.4 | -21.1      | -20.4 | -18.4 | -24.0       | -23.3 | -21.9 | -24.1      | -23.4 | -21.5 |
| <b>Passive humus, Mg/ha/yr</b> |         |            |       |       |            |       |       |             |       |       |            |       |       |
| KS1                            | +1.0    | +1.1       | +1.0  | +0.8  | +1.1       | +1.0  | +0.8  | +0.5        | +0.5  | +0.4  | +0.5       | +0.4  | +0.3  |
| KS2                            | +0.6    | +0.6       | +0.6  | +0.6  | +0.6       | +0.6  | +0.5  | +0.6        | +0.6  | +0.6  | +0.6       | +0.6  | +0.3  |
| WY                             | +0.7    | +0.7       | +0.7  | +0.7  | +0.7       | +0.7  | +0.7  | +0.6        | +0.7  | +0.7  | +0.6       | +0.6  | +0.7  |
| MT                             | +0.7    | +0.8       | +0.8  | +0.8  | +0.7       | +0.8  | +0.8  | +0.6        | +0.6  | +0.6  | +0.6       | +0.6  | +0.6  |
| SD                             | +2.0    | +2.2       | +2.6  | +2.7  | +1.9       | +2.4  | +2.6  | +2.4        | +2.4  | +2.4  | +1.9       | +2.3  | +2.4  |
| NE                             | +1.5    | +1.5       | +1.5  | +1.6  | +1.5       | +1.5  | +1.6  | +1.5        | +1.5  | +1.5  | +1.5       | +1.5  | +1.5  |
| <b>Plant litter, Mg/ha/yr</b>  |         |            |       |       |            |       |       |             |       |       |            |       |       |
| KS1                            | +3.0    | +2.8       | +2.7  | +2.0  | +2.9       | +2.7  | +2.1  | +2.0        | +1.9  | +1.5  | +2.1       | +1.9  | +1.6  |
| KS2                            | +3.3    | +3.0       | +2.9  | +2.7  | +3.0       | +2.9  | +2.5  | +3.0        | +2.8  | +2.6  | +3.0       | +2.9  | +0.9  |
| WY                             | +0.6    | +0.7       | +0.6  | +0.2  | +0.7       | +0.7  | +0.6  | -0.2        | -0.3  | -0.4  | -0.2       | -0.3  | +0.6  |
| MT                             | +0.4    | +1.0       | +1.2  | +1.3  | +1.0       | +1.1  | +1.1  | -0.3        | -0.3  | -0.2  | -0.4       | -0.4  | -0.4  |
| SD                             | +1.3    | +1.4       | +1.4  | +1.3  | +1.2       | +1.3  | +1.2  | +0.6        | +0.6  | +0.5  | +0.5       | +0.5  | +0.4  |
| NE                             | +3.8    | +3.1       | +3.1  | +2.8  | +3.1       | +3.0  | +2.8  | +0.6        | +0.6  | +0.6  | +0.5       | +0.5  | +0.5  |
| <b>Biomass, Mg/ha/yr</b>       |         |            |       |       |            |       |       |             |       |       |            |       |       |
| KS1                            | +3.1    | +2.6       | +2.4  | +1.7  | +2.7       | +2.4  | +1.8  | +0.9        | +0.8  | +0.5  | +0.9       | +0.8  | +0.4  |
| KS2                            | +5.4    | +4.5       | +4.2  | +3.6  | +4.6       | +4.3  | +3.7  | +4.5        | +4.2  | +3.6  | +4.6       | +4.3  | +0.8  |
| WY                             | -1.9    | -1.9       | -2.0  | -2.2  | -1.9       | -1.9  | -2.0  | -2.5        | -2.6  | -2.6  | -2.6       | -2.6  | -2.0  |
| MT                             | +0.9    | +0.9       | +0.8  | +0.7  | +0.8       | +0.8  | +0.8  | -0.7        | -0.7  | -0.7  | -0.7       | -0.7  | -0.7  |
| SD                             | -2.6    | -2.7       | -2.8  | -3.0  | -2.3       | -2.7  | -2.9  | -3.4        | -3.5  | -3.5  | -2.9       | -3.5  | -3.5  |
| NE                             | -1.5    | -1.4       | -1.4  | -1.6  | -1.4       | -1.4  | -1.6  | -2.6        | -2.6  | -2.6  | -2.6       | -2.6  | -2.6  |

KS1 = Konza Prairie Biological Station, Manhattan, KS; KS2 = Kansas State University Research and Education Center, Hays, KS; WY = USDA Agricultural Research Service High Plains Grasslands Research Station, Cheyenne, WY; MT = USDA Agricultural Research Service Livestock and Range Research Laboratory, Miles City, MT; SD = South Dakota State University Cottonwood Range and Livestock Field Station, Philip, SD; NE = University of Nebraska Gudmundsen Sandhills Laboratory, Whitman, NE.

## Supplemental Data from IFSM model

**Table S5.** Blue water uses among rangeland management scenarios for each site from IFSM

| Item                                 | No Burn    |         |         |         |            |         |         |         | Spring Burn |         |            |         |         |
|--------------------------------------|------------|---------|---------|---------|------------|---------|---------|---------|-------------|---------|------------|---------|---------|
|                                      | Continuous |         |         |         | Rotational |         |         |         | Continuous  |         | Rotational |         |         |
|                                      | No Mgmt    | Low     | Mod     | High    | Low        | Mod     | High    | Low     | Mod         | High    | Low        | Mod     | High    |
| <b>Evapotranspiration, Mg/ha</b>     |            |         |         |         |            |         |         |         |             |         |            |         |         |
| KS1                                  | 8529       | 8516    | 8499    | 8487    | 8520       | 8509    | 8491    | 8502    | 8494        | 8485    | 8511       | 8502    | 8490    |
| KS2                                  | 5015       | 4804    | 4763    | 4733    | 4862       | 4795    | 4766    | 4798    | 4756        | 4726    | 4852       | 4789    | 4748    |
| WY                                   | 5174       | 5072    | 5163    | 5351    | 5087       | 5295    | 5356    | 5069    | 5155        | 5349    | 5081       | 5282    | 5356    |
| MT                                   | 3883       | 3855    | 3878    | 3930    | 3887       | 3924    | 4027    | 3787    | 3798        | 3821    | 3805       | 3820    | 3885    |
| SD                                   | 4730       | 4709    | 4714    | 4763    | 4724       | 4743    | 4787    | 4709    | 4714        | 4729    | 4712       | 4719    | 4743    |
| NE                                   | 5805       | 5726    | 5731    | 5739    | 5735       | 5760    | 5710    | 5687    | 5686        | 5738    | 5712       | 5710    | 5710    |
| <b>Drinking, Mg</b>                  |            |         |         |         |            |         |         |         |             |         |            |         |         |
| KS1                                  | -          | 2104    | 3187    | 6037    | 2091       | 3149    | 5979    | 2123    | 3199        | 6188    | 2108       | 3177    | 6030    |
| KS2                                  | -          | 566     | 812     | 1481    | 566        | 806     | 1444    | 574     | 819         | 1561    | 570        | 815     | 1490    |
| WY                                   | -          | 274     | 1063    | 1628    | 273        | 1070    | 1624    | 279     | 1070        | 1641    | 275        | 1080    | 1639    |
| MT                                   | -          | 2426    | 2898    | 3868    | 2277       | 2850    | 3806    | 3410    | 4014        | 5249    | 2944       | 3670    | 4846    |
| SD                                   | -          | 1224    | 1943    | 2806    | 1192       | 1887    | 2841    | 1249    | 1983        | 2955    | 1230       | 1946    | 2953    |
| NE                                   | -          | 1408    | 2101    | 4237    | 1412       | 2115    | 4171    | 1520    | 2282        | 4067    | 1438       | 2171    | 4085    |
| <b>Purchased feed production, Mg</b> |            |         |         |         |            |         |         |         |             |         |            |         |         |
| KS1                                  | -          | 7523    | 11,452  | 22,707  | 6953       | 10,436  | 19,973  | 7948    | 11,832      | 32,444  | 7523       | 11,081  | 22,360  |
| KS2                                  | -          | 717     | 981     | 2441    | 745        | 993     | 1645    | 852     | 1167        | 2400    | 883        | 1187    | 4234    |
| WY                                   | -          | 1109    | 4014    | 8204    | 668        | 2298    | 9403    | 2116    | 9780        | 6202    | 1787       | 5691    | 11,787  |
| MT                                   | -          | 106,522 | 132,301 | 176,227 | 83,219     | 104,078 | 138,934 | 212,468 | 254,439     | 335,822 | 171,494    | 212,419 | 280,630 |
| SD                                   | -          | 50,661  | 79,980  | 95,960  | 40,677     | 64,365  | 97,443  | 51,085  | 80,486      | 122,260 | 51,317     | 80,532  | 121,187 |
| NE                                   | -          | 39,824  | 59,317  | 124,321 | 39,756     | 59,070  | 122,787 | 69,356  | 105,003     | 150,292 | 58,593     | 89,104  | 125,690 |

KS1 = Konza Prairie Biological Station, Manhattan, KS; KS2 = Kansas State University Research and Education Center, Hays, KS; WY = USDA Agricultural Research Service High Plains Grasslands Research Station, Cheyenne, WY; MT = USDA Agricultural Research Service Livestock and Range Research Laboratory, Miles City, MT; SD = South Dakota State University Cottonwood Range and Livestock Field Station, Philip, SD; NE = University of Nebraska Gudmundsen Sandhills Laboratory, Whitman, NE.



**Table S6.** Reactive nitrogen losses among rangeland management scenarios for each site from IFSM

| Item                            | No Burn    |      |      |            |      |      | Spring Burn |      |      |            |      |      |      |
|---------------------------------|------------|------|------|------------|------|------|-------------|------|------|------------|------|------|------|
|                                 | Continuous |      |      | Rotational |      |      | Continuous  |      |      | Rotational |      |      |      |
|                                 | No Mgmt    | Low  | Mod  | High       | Low  | Mod  | High        | Low  | Mod  | High       | Low  | Mod  | High |
| <b>Ammonia, kg</b>              |            |      |      |            |      |      |             |      |      |            |      |      |      |
| KS1                             | 174        | 1518 | 2160 | 4036       | 1488 | 2162 | 3987        | 1489 | 2157 | 4477       | 1505 | 2176 | 4124 |
| KS2                             | 68         | 430  | 580  | 986        | 442  | 595  | 1008        | 436  | 588  | 1101       | 456  | 623  | 960  |
| WY                              | 222        | 266  | 784  | 1207       | 293  | 842  | 1252        | 270  | 681  | 1125       | 296  | 737  | 1294 |
| MT                              | 475        | 2336 | 2735 | 3503       | 2310 | 2743 | 3429        | 2711 | 2944 | 3661       | 2363 | 2780 | 3495 |
| SD                              | 136        | 886  | 1377 | 2110       | 926  | 1429 | 2150        | 875  | 1374 | 2083       | 892  | 1381 | 2096 |
| NE                              | 245        | 1051 | 1448 | 2790       | 1040 | 1455 | 2765        | 1041 | 1438 | 2645       | 1023 | 1440 | 2719 |
| <b>De/nitrification, kg</b>     |            |      |      |            |      |      |             |      |      |            |      |      |      |
| KS1                             | 725        | 881  | 971  | 1283       | 879  | 963  | 1290        | 885  | 972  | 1679       | 882  | 967  | 1316 |
| KS2                             | 62         | 101  | 127  | 248        | 104  | 132  | 265         | 103  | 130  | 288        | 105  | 135  | 292  |
| WY                              | 237        | 167  | 335  | 434        | 185  | 335  | 460         | 197  | 333  | 423        | 222  | 334  | 466  |
| MT                              | 338        | 853  | 915  | 1010       | 787  | 845  | 898         | 1018 | 1077 | 1182       | 868  | 929  | 987  |
| SD                              | 77         | 236  | 397  | 725        | 278  | 463  | 803         | 219  | 399  | 724        | 256  | 437  | 794  |
| NE                              | 757        | 1030 | 1170 | 1958       | 1030 | 1197 | 2144        | 1000 | 1147 | 1969       | 994  | 1175 | 2161 |
| <b>Fuel combustion, kg</b>      |            |      |      |            |      |      |             |      |      |            |      |      |      |
| KS1                             | -          | 46   | 46   | 46         | 46   | 46   | 46          | 46   | 46   | 51         | 46   | 46   | 46   |
| KS2                             | -          | 25   | 25   | 26         | 25   | 25   | 25          | 25   | 25   | 26         | 25   | 25   | 26   |
| WY                              | -          | 25   | 25   | 26         | 25   | 25   | 26          | 25   | 25   | 26         | 25   | 26   | 26   |
| MT                              | -          | 83   | 84   | 85         | 82   | 83   | 84          | 86   | 88   | 90         | 85   | 86   | 88   |
| SD                              | -          | 74   | 74   | 75         | 73   | 74   | 75          | 74   | 74   | 76         | 74   | 74   | 76   |
| NE                              | -          | 75   | 76   | 78         | 75   | 76   | 77          | 76   | 78   | 79         | 76   | 77   | 78   |
| <b>Production of inputs, kg</b> |            |      |      |            |      |      |             |      |      |            |      |      |      |
| KS1                             | -          | 69   | 104  | 202        | 65   | 97   | 185         | 72   | 107  | 838        | 69   | 102  | 199  |
| KS2                             | -          | 13   | 18   | 65         | 13   | 17   | 44          | 14   | 19   | 159        | 14   | 19   | 64   |
| WY                              | -          | 9    | 41   | 141        | 7    | 41   | 140         | 13   | 67   | 201        | 12   | 66   | 150  |
| MT                              | -          | 132  | 165  | 220        | 126  | 169  | 241         | 240  | 266  | 376        | 220  | 282  | 386  |
| SD                              | -          | 154  | 237  | 361        | 169  | 260  | 387         | 165  | 254  | 367        | 161  | 244  | 357  |
| NE                              | -          | 201  | 291  | 567        | 200  | 294  | 579         | 183  | 266  | 514        | 187  | 271  | 550  |

KS1 = Konza Prairie Biological Station, Manhattan, KS; KS2 = Kansas State University Research and Education Center, Hays, KS; WY = USDA Agricultural Research Service High Plains Grasslands Research Station, Cheyenne, WY; MT = USDA Agricultural Research Service Livestock and Range Research Laboratory, Miles City, MT; SD = South Dakota State University Cottonwood Range and Livestock Field Station, Philip, SD; NE = University of Nebraska Gudmundsen Sandhills Laboratory, Whitman, NE.

**Table S7.** Energy uses among rangeland management scenarios for each site from IFSM

| Item                        | No Burn    |     |     |      |            |     |      |      | Spring Burn |      |     |      |            |  |  |  |
|-----------------------------|------------|-----|-----|------|------------|-----|------|------|-------------|------|-----|------|------------|--|--|--|
|                             | Continuous |     |     |      | Rotational |     |      |      | Continuous  |      |     |      | Rotational |  |  |  |
|                             | No Mgmt    | Low | Mod | High | Low        | Mod | High | Low  | Mod         | High | Low | Mod  | High       |  |  |  |
| Feed production, MJ/ha      |            |     |     |      |            |     |      |      |             |      |     |      |            |  |  |  |
| KS1                         | -          | 192 | 192 | 192  | 192        | 192 | 192  | 192  | 192         | 192  | 192 | 192  | 192        |  |  |  |
| KS2                         | -          | 430 | 430 | 430  | 430        | 430 | 430  | 430  | 430         | 430  | 430 | 430  | 430        |  |  |  |
| WY                          | -          | 431 | 431 | 431  | 431        | 431 | 431  | 431  | 441         | 431  | 431 | 431  | 431        |  |  |  |
| MT                          | -          | 224 | 224 | 224  | 224        | 224 | 224  | 224  | 224         | 224  | 224 | 224  | 224        |  |  |  |
| SD                          | -          | 350 | 350 | 350  | 350        | 350 | 350  | 350  | 350         | 350  | 350 | 350  | 350        |  |  |  |
| NE                          | -          | 337 | 337 | 337  | 337        | 337 | 337  | 337  | 337         | 337  | 337 | 337  | 337        |  |  |  |
| Animal feeding, MJ/ha       |            |     |     |      |            |     |      |      |             |      |     |      |            |  |  |  |
| KS1                         | -          | 0   | 0   | 0    | 0          | 0   | 0    | 0    | 0           | 18   | 0   | 0    | 0          |  |  |  |
| KS2                         | -          | 0   | 0   | 4    | 0          | 0   | 2    | 0    | 0           | 15   | 0   | 0    | 3          |  |  |  |
| WY                          | -          | 0   | 2   | 11   | 0          | 3   | 11   | 0    | 2           | 20   | 0   | 4    | 10         |  |  |  |
| MT                          | -          | 10  | 12  | 16   | 8          | 9   | 12   | 19   | 24          | 31   | 15  | 19   | 25         |  |  |  |
| SD                          | -          | 7   | 11  | 13   | 5          | 8   | 13   | 7    | 11          | 17   | 7   | 11   | 17         |  |  |  |
| NE                          | -          | 4   | 7   | 14   | 4          | 7   | 14   | 10   | 15          | 19   | 8   | 12   | 15         |  |  |  |
| Animal housing, MJ/ha       |            |     |     |      |            |     |      |      |             |      |     |      |            |  |  |  |
| KS1                         | -          | 0   | 0   | 0    | 0          | 0   | 0    | 0    | 0           | 0    | 0   | 0    | 0          |  |  |  |
| KS2                         | -          | 0   | 0   | 0    | 0          | 0   | 0    | 0    | 0           | 0    | 0   | 0    | 0          |  |  |  |
| WY                          | -          | 0   | 0   | 0    | 0          | 0   | 0    | 0    | 0           | 0    | 0   | 0    | 0          |  |  |  |
| MT                          | -          | 6   | 8   | 11   | 6          | 8   | 11   | 6    | 8           | 11   | 6   | 8    | 11         |  |  |  |
| SD                          | -          | 4   | 7   | 10   | 4          | 7   | 10   | 4    | 7           | 10   | 4   | 7    | 10         |  |  |  |
| NE                          | -          | 5   | 7   | 14   | 5          | 7   | 14   | 5    | 7           | 14   | 5   | 7    | 14         |  |  |  |
| Production of inputs, MJ/ha |            |     |     |      |            |     |      |      |             |      |     |      |            |  |  |  |
| KS1                         | -          | 146 | 206 | 366  | 142        | 195 | 345  | 152  | 209         | 1288 | 147 | 202  | 362        |  |  |  |
| KS2                         | -          | 174 | 216 | 573  | 174        | 214 | 457  | 182  | 226         | 1185 | 180 | 222  | 541        |  |  |  |
| WY                          | -          | 119 | 364 | 1077 | 114        | 396 | 1118 | 129  | 430         | 1347 | 126 | 482  | 1182       |  |  |  |
| MT                          | -          | 586 | 703 | 913  | 492        | 601 | 784  | 1157 | 1234        | 1617 | 924 | 1132 | 891        |  |  |  |
| SD                          | -          | 559 | 835 | 1082 | 511        | 759 | 1101 | 569  | 850         | 1233 | 566 | 841  | 1224       |  |  |  |
| NE                          | -          | 508 | 722 | 1394 | 508        | 725 | 1396 | 657  | 953         | 1481 | 599 | 866  | 1385       |  |  |  |

KS1 = Konza Prairie Biological Station, Manhattan, KS; KS2 = Kansas State University Research and Education Center, Hays, KS; WY = USDA Agricultural Research Service High Plains Grasslands Research Station, Cheyenne, WY; MT = USDA Agricultural Research Service Livestock and Range Research Laboratory, Miles City, MT; SD = South Dakota State University Cottonwood Range and Livestock Field Station, Philip, SD; NE = University of Nebraska Gudmundsen Sandhills Laboratory, Whitman, NE.

**Table S8.** Greenhouse gas emissions among rangeland management scenarios for each site from IFSM

| Item                          | No Mgmt | No Burn    |     |      |            |     |      | Spring Burn |     |      |            |     |      |
|-------------------------------|---------|------------|-----|------|------------|-----|------|-------------|-----|------|------------|-----|------|
|                               |         | Continuous |     |      | Rotational |     |      | Continuous  |     |      | Rotational |     |      |
|                               |         | Low        | Mod | High | Low        | Mod | High | Low         | Mod | High | Low        | Mod | High |
| Animal emissions, kg CO2e/ha  |         |            |     |      |            |     |      |             |     |      |            |     |      |
| KS1                           | -       | 355        | 539 | 1038 | 348        | 527 | 1001 | 358         | 540 | 1101 | 355        | 533 | 1035 |
| KS2                           | -       | 365        | 518 | 910  | 372        | 527 | 905  | 376         | 534 | 941  | 386        | 545 | 880  |
| WY                            | -       | 166        | 617 | 969  | 177        | 663 | 1005 | 142         | 493 | 861  | 149        | 561 | 1021 |
| MT                            | -       | 364        | 453 | 603  | 362        | 447 | 588  | 353         | 443 | 579  | 343        | 423 | 561  |
| SD                            | -       | 209        | 332 | 498  | 206        | 329 | 501  | 209         | 331 | 497  | 211        | 332 | 500  |
| NE                            | -       | 210        | 316 | 631  | 210        | 313 | 616  | 218         | 328 | 660  | 219        | 326 | 624  |
| Manure emissions, kg CO2e/ha  |         |            |     |      |            |     |      |             |     |      |            |     |      |
| KS1                           | -       | 2          | 3   | 5    | 2          | 3   | 5    | 2           | 2   | 7    | 2          | 3   | 5    |
| KS2                           | -       | 2          | 3   | 6    | 2          | 2   | 6    | 2           | 3   | 7    | 2          | 3   | 6    |
| WY                            | -       | 1          | 3   | 5    | 1          | 2   | 5    | 1           | 3   | 6    | 1          | 3   | 5    |
| MT                            | -       | 6          | 8   | 10   | 6          | 8   | 10   | 6           | 8   | 10   | 6          | 7   | 10   |
| SD                            | -       | 4          | 6   | 9    | 4          | 6   | 9    | 4           | 6   | 9    | 4          | 6   | 9    |
| NE                            | -       | 4          | 6   | 11   | 4          | 6   | 11   | 4           | 6   | 12   | 4          | 6   | 11   |
| Land emissions, kg CO2e/ha    |         |            |     |      |            |     |      |             |     |      |            |     |      |
| KS1                           | 167     | 201        | 221 | 291  | 201        | 219 | 292  | 202         | 222 | 379  | 202        | 220 | 298  |
| KS2                           | 63      | 100        | 125 | 241  | 103        | 129 | 257  | 102         | 128 | 280  | 104        | 132 | 283  |
| WY                            | 50      | 45         | 86  | 112  | 49         | 85  | 120  | 53          | 86  | 108  | 59         | 85  | 122  |
| MT                            | 21      | 53         | 57  | 62   | 49         | 52  | 54   | 64          | 67  | 73   | 54         | 57  | 60   |
| SD                            | 10      | 32         | 54  | 97   | 38         | 62  | 106  | 29          | 54  | 97   | 35         | 59  | 105  |
| NE                            | 26      | 39         | 45  | 73   | 38         | 45  | 78   | 39          | 45  | 75   | 38         | 45  | 80   |
| Anthropogenic CO2, kg CO2e/ha |         |            |     |      |            |     |      |             |     |      |            |     |      |
| KS1                           | -       | 14         | 14  | 14   | 14         | 14  | 14   | 14          | 14  | 15   | 14         | 14  | 14   |
| KS2                           | -       | 31         | 31  | 31   | 31         | 20  | 31   | 31          | 31  | 32   | 31         | 20  | 31   |
| WY                            | -       | 31         | 31  | 32   | 31         | 31  | 32   | 31          | 31  | 32   | 31         | 31  | 32   |
| MT                            | -       | 17         | 17  | 17   | 17         | 17  | 17   | 17          | 18  | 18   | 17         | 17  | 18   |
| SD                            | -       | 26         | 26  | 26   | 25         | 26  | 26   | 26          | 26  | 26   | 26         | 26  | 26   |
| NE                            | -       | 24         | 25  | 25   | 24         | 25  | 25   | 25          | 25  | 26   | 25         | 25  | 25   |
| Production of inputs, CO2e/ha |         |            |     |      |            |     |      |             |     |      |            |     |      |
| KS1                           | -       | 19         | 27  | 50   | 18         | 25  | 47   | 19          | 28  | 125  | 19         | 26  | 49   |
| KS2                           | -       | 21         | 27  | 62   | 21         | 26  | 52   | 22          | 32  | 213  | 22         | 17  | 62   |
| WY                            | -       | 13         | 39  | 98   | 12         | 39  | 101  | 15          | 50  | 122  | 14         | 50  | 107  |
| MT                            | -       | 49         | 58  | 76   | 41         | 51  | 66   | 97          | 101 | 132  | 77         | 95  | 122  |
| SD                            | -       | 48         | 70  | 92   | 44         | 65  | 94   | 48          | 72  | 104  | 48         | 71  | 103  |
| NE                            | -       | 44         | 62  | 119  | 44         | 63  | 120  | 55          | 79  | 125  | 51         | 73  | 118  |

---

KS1 = Konza Prairie Biological Station, Manhattan, KS; KS2 = Kansas State University Research and Education Center, Hays, KS; WY = USDA Agricultural Research Service High Plains Grasslands Research Station, Cheyenne, WY; MT = USDA Agricultural Research Service Livestock and Range Research Laboratory, Miles City, MT; SD = South Dakota State University Cottonwood Range and Livestock Field Station, Philip, SD; NE = University of Nebraska Gudmundsen Sandhills Laboratory, Whitman, NE.

**Table S9.** Ranch-level expenses among rangeland management scenarios for each site from IFSM

| Item             | No Mgmt | No Burn    |        |         |            |        |         |        | Spring Burn |         |        |            |         |
|------------------|---------|------------|--------|---------|------------|--------|---------|--------|-------------|---------|--------|------------|---------|
|                  |         | Continuous |        |         | Rotational |        |         |        | Continuous  |         |        | Rotational |         |
|                  |         | Low        | Mod    | High    | Low        | Mod    | High    | Low    | Mod         | High    | Low    | Mod        | High    |
| Equipment, \$/ha |         |            |        |         |            |        |         |        |             |         |        |            |         |
| KS1              | -       | 3.44       | 3.44   | 4.81    | 3.44       | 3.44   | 4.81    | 3.44   | 3.44        | 10.27   | 3.44   | 3.44       | 4.81    |
| KS2              | -       | 10.92      | 10.92  | 33.09   | 10.92      | 10.92  | 33.09   | 10.92  | 10.92       | 33.09   | 10.92  | 10.92      | 33.09   |
| WY               | -       | 10.96      | 33.20  | 33.21   | 10.96      | 33.20  | 33.21   | 10.96  | 33.20       | 33.21   | 10.96  | 33.20      | 33.21   |
| MT               | -       | 12.90      | 12.96  | 13.04   | 12.86      | 12.89  | 12.96   | 13.10  | 13.19       | 13.34   | 13.03  | 13.10      | 13.22   |
| SD               | -       | 16.71      | 16.71  | 16.71   | 16.70      | 16.71  | 16.71   | 16.71  | 16.71       | 16.72   | 16.71  | 16.71      | 16.72   |
| NE               | -       | 9.28       | 9.30   | 9.38    | 9.28       | 9.30   | 9.37    | 9.33   | 9.38        | 9.43    | 9.31   | 9.35       | 9.38    |
| Energy, \$/ha    |         |            |        |         |            |        |         |        |             |         |        |            |         |
| KS1              | -       | 3.98       | 3.98   | 3.98    | 3.98       | 3.98   | 3.98    | 3.98   | 3.98        | 4.36    | 3.98   | 3.98       | 3.98    |
| KS2              | -       | 5.46       | 8.89   | 8.98    | 8.89       | 8.89   | 8.93    | 8.89   | 8.89        | 9.21    | 8.89   | 8.89       | 8.95    |
| WY               | -       | 9.14       | 9.18   | 9.38    | 9.14       | 9.20   | 9.37    | 9.14   | 9.18        | 9.56    | 9.14   | 9.23       | 9.37    |
| MT               | -       | 5.12       | 5.21   | 5.36    | 5.07       | 5.15   | 5.28    | 5.31   | 5.45        | 5.67    | 5.24   | 5.35       | 5.55    |
| SD               | -       | 7.50       | 7.66   | 7.78    | 7.46       | 7.59   | 7.78    | 7.50   | 7.65        | 7.88    | 7.50   | 7.66       | 7.87    |
| NE               | -       | 7.18       | 7.28   | 7.61    | 7.18       | 7.28   | 7.60    | 7.28   | 7.45        | 7.71    | 7.25   | 7.39       | 7.62    |
| Labor, \$/ha     |         |            |        |         |            |        |         |        |             |         |        |            |         |
| KS1              | -       | 97.03      | 111.17 | 182.01  | 154.16     | 176.69 | 306.23  | 97.05  | 111.18      | 182.84  | 154.18 | 176.71     | 306.28  |
| KS2              | -       | 114.44     | 124.24 | 183.24  | 177.69     | 193.03 | 303.78  | 114.46 | 124.27      | 183.79  | 177.71 | 193.05     | 303.95  |
| WY               | -       | 57.78      | 100.54 | 131.75  | 82.37      | 153.20 | 202.26  | 57.82  | 100.78      | 131.88  | 82.41  | 153.37     | 202.43  |
| MT               | -       | 68.68      | 66.44  | 78.60   | 101.30     | 98.78  | 117.15  | 69.33  | 67.09       | 79.47   | 101.81 | 99.41      | 117.97  |
| SD               | -       | 40.90      | 46.21  | 59.62   | 56.75      | 65.94  | 85.40   | 40.93  | 46.25       | 59.79   | 56.80  | 66.00      | 85.50   |
| NE               | -       | 46.76      | 52.50  | 84.02   | 67.04      | 75.62  | 124.61  | 46.90  | 52.72       | 84.01   | 67.12  | 75.74      | 124.54  |
| Feed, \$/ha      |         |            |        |         |            |        |         |        |             |         |        |            |         |
| KS1              | -       | 15.16      | 23.51  | 45.63   | 14.58      | 22.04  | 42.77   | 15.94  | 24.02       | 85.59   | 15.28  | 22.95      | 45.05   |
| KS2              | -       | 13.70      | 19.87  | 42.97   | 13.69      | 19.43  | 37.08   | 14.86  | 21.18       | 70.99   | 14.54  | 20.59      | 43.45   |
| WY               | -       | 5.35       | 24.22  | 68.84   | 4.90       | 25.51  | 69.01   | 6.38   | 30.57       | 89.88   | 5.99   | 31.68      | 72.92   |
| MT               | -       | 32.60      | 40.37  | 53.81   | 26.06      | 32.68  | 43.74   | 65.01  | 75.44       | 99.78   | 5.22   | 64.82      | 85.53   |
| SD               | -       | 26.47      | 41.79  | 56.80   | 24.43      | 38.53  | 57.86   | 27.10  | 42.86       | 63.83   | 26.83  | 42.14      | 63.47   |
| NE               | -       | 26.27      | 38.89  | 78.22   | 26.28      | 39.24  | 78.74   | 32.99  | 49.41       | 80.32   | 30.16  | 45.22      | 77.13   |
| Livestock, \$/ha |         |            |        |         |            |        |         |        |             |         |        |            |         |
| KS1              | -       | 456.27     | 687.52 | 1297.18 | 456.27     | 687.52 | 1297.18 | 456.27 | 690.31      | 1297.18 | 456.27 | 687.52     | 1297.18 |
| KS2              | -       | 488.98     | 698.55 | 1207.14 | 488.98     | 698.55 | 1207.49 | 488.98 | 698.55      | 1207.49 | 488.98 | 698.55     | 1207.49 |
| WY               | -       | 194.89     | 744.77 | 1096.27 | 194.89     | 744.77 | 1096.27 | 194.89 | 744.77      | 1096.27 | 194.89 | 744.77     | 1096.27 |
| MT               | -       | 27.13      | 33.88  | 45.13   | 27.13      | 33.88  | 45.13   | 27.13  | 33.88       | 45.13   | 27.13  | 33.88      | 45.13   |
| SD               | -       | 17.93      | 28.60  | 43.36   | 17.93      | 28.60  | 43.36   | 17.93  | 28.60       | 43.36   | 17.93  | 28.60      | 43.36   |

|                            |       |       |       |       |       |       |       |       |       |       |       |       |       |
|----------------------------|-------|-------|-------|-------|-------|-------|-------|-------|-------|-------|-------|-------|-------|
| NE                         | -     | 17.97 | 26.95 | 53.90 | 17.97 | 26.95 | 53.90 | 17.97 | 26.95 | 54.15 | 17.97 | 26.95 | 53.90 |
| <b>Property tax, \$/ha</b> |       |       |       |       |       |       |       |       |       |       |       |       |       |
| KS1                        | 15.23 | 15.23 | 15.23 | 15.23 | 15.23 | 15.23 | 12.70 | 15.23 | 15.23 | 15.23 | 15.23 | 15.23 | 15.23 |
| KS2                        | 16.13 | 16.13 | 16.13 | 16.13 | 16.13 | 16.13 | 16.13 | 16.13 | 16.13 | 19.56 | 16.13 | 16.13 | 16.13 |
| WY                         | 8.32  | 8.32  | 8.32  | 8.32  | 8.32  | 8.32  | 8.32  | 8.32  | 8.33  | 8.32  | 8.32  | 8.32  | 8.32  |
| MT                         | 17.20 | 17.20 | 17.20 | 17.20 | 17.20 | 17.20 | 17.20 | 17.20 | 17.20 | 17.20 | 17.20 | 17.20 | 17.20 |
| SD                         | 16.48 | 16.48 | 16.48 | 16.48 | 16.48 | 16.48 | 16.48 | 16.48 | 16.48 | 16.48 | 16.48 | 16.48 | 16.48 |
| NE                         | 21.98 | 21.98 | 21.98 | 21.98 | 12.80 | 21.98 | 21.98 | 21.98 | 21.98 | 21.98 | 21.98 | 21.98 | 21.98 |

KS1 = Konza Prairie Biological Station, Manhattan, KS; KS2 = Kansas State University Research and Education Center, Hays, KS; WY = USDA Agricultural Research Service High Plains Grasslands Research Station, Cheyenne, WY; MT = USDA Agricultural Research Service Livestock and Range Research Laboratory, Miles City, MT; SD = South Dakota State University Cottonwood Range and Livestock Field Station, Philip, SD; NE = University of Nebraska Gudmundsen Sandhills Laboratory, Whitman, NE.

## Supplemental Data from IMPLAN model

**Table S10.** Economic and employment impact of rangeland management scenarios at Konza Prairie Biological Station (KS1) from IMPLAN model

|                     | No Burn           |                   |                   |                   |                   |                   | Spring Burn       |                   |                   |                   |                   |                   |
|---------------------|-------------------|-------------------|-------------------|-------------------|-------------------|-------------------|-------------------|-------------------|-------------------|-------------------|-------------------|-------------------|
|                     | Continuous        |                   |                   | Rotational        |                   |                   | Continuous        |                   |                   | Rotational        |                   |                   |
|                     | Low               | Mod               | High              |
| <b>Employment</b>   |                   |                   |                   |                   |                   |                   |                   |                   |                   |                   |                   |                   |
| Direct              | 1.52              | 1.58              | 1.9               | 1.87              | 1.95              | 2.54              | 1.52              | 1.58              | 1.9               | 1.87              | 1.95              | 2.54              |
| Indirect            | 0.69              | 0.96              | 1.49              | 0.63              | 0.85              | 1.35              | 0.66              | 0.89              | 1.39              | 0.58              | 0.8               | 1.3               |
| Induced             | 0.19              | 0.27              | 0.42              | 0.18              | 0.24              | 0.38              | 0.34              | 0.25              | 0.39              | 0.16              | 0.22              | 0.37              |
| <b>Total</b>        | <b>2.4</b>        | <b>2.81</b>       | <b>3.8</b>        | <b>2.68</b>       | <b>3.04</b>       | <b>4.27</b>       | <b>2.37</b>       | <b>2.72</b>       | <b>3.68</b>       | <b>2.62</b>       | <b>2.97</b>       | <b>4.21</b>       |
| <b>Labor Income</b> |                   |                   |                   |                   |                   |                   |                   |                   |                   |                   |                   |                   |
| Direct              | 20,691.00         | 28,898.00         | 44,811.00         | 18,956.00         | 25,593.00         | 40,811.00         | 19,940.00         | 26,915.00         | 41,811.00         | 18,690.15         | 24,023.00         | 39,241.00         |
| Indirect            | 24,246.13         | 33,862.65         | 52,508.64         | 22,212.64         | 29,989.64         | 47,822.68         | 23,365.00         | 31,538.84         | 48,994.13         | 21,557.52         | 28,150.12         | 45,981.47         |
| Induced             | 6,171.99          | 8,620.00          | 13,366.58         | 5,654.39          | 7,634.11          | 12,173.58         | 5,947.82          | 8,028.46          | 12,471.83         | 5,458.90          | 7,165.83          | 11,705.06         |
| <b>Total</b>        | <b>51,109.12</b>  | <b>71,380.65</b>  | <b>110,686.22</b> | <b>46,823.03</b>  | <b>63,216.75</b>  | <b>100,807.27</b> | <b>49,252.82</b>  | <b>66,482.31</b>  | <b>103,276.95</b> | <b>45,706.58</b>  | <b>59,338.95</b>  | <b>96,927.53</b>  |
| <b>Value Added</b>  |                   |                   |                   |                   |                   |                   |                   |                   |                   |                   |                   |                   |
| Direct              | 41,710.00         | 58,255.00         | 90,332.00         | 38,213.00         | 51,592.00         | 82,270.00         | 40,196.00         | 54,257.00         | 84,286.00         | 37,677.13         | 48,427.00         | 79,104.00         |
| Indirect            | 41,407.15         | 57,830.08         | 89,673.39         | 37,934.38         | 51,215.81         | 81,670.79         | 39,902.37         | 53,861.52         | 83,671.36         | 36,858.36         | 48,074.32         | 78,526.39         |
| Induced             | 12,713.56         | 17,756.18         | 27,533.57         | 11,647.38         | 15,725.37         | 25,076.15         | 12,251.80         | 16,537.69         | 25,690.49         | 11,256.83         | 14,760.76         | 24,111.04         |
| <b>Total</b>        | <b>95,830.71</b>  | <b>133,841.25</b> | <b>207,538.96</b> | <b>87,794.76</b>  | <b>118,533.18</b> | <b>189,016.94</b> | <b>92,350.17</b>  | <b>124,656.20</b> | <b>193,647.85</b> | <b>85,792.32</b>  | <b>111,262.07</b> | <b>181,741.43</b> |
| <b>Output</b>       |                   |                   |                   |                   |                   |                   |                   |                   |                   |                   |                   |                   |
| Direct              | 170,077.00        | 237,535.00        | 368,330.00        | 155,814.00        | 210,367.00        | 335,459.00        | 163,898.00        | 221,234.00        | 343,677.00        | 153,628.84        | 197,463.00        | 322,545.00        |
| Indirect            | 127,628.12        | 178,248.07        | 276,397.85        | 116,924.09        | 157,861.10        | 251,731.65        | 122,989.97        | 166,015.88        | 257,897.95        | 114,495.78        | 148,178.15        | 242,039.76        |
| Induced             | 24,919.61         | 34,803.54         | 53,968.02         | 22,829.81         | 30,822.99         | 49,151.27         | 24,014.52         | 32,415.20         | 50,355.43         | 22,070.55         | 28,932.27         | 47,259.59         |
| <b>Total</b>        | <b>322,624.73</b> | <b>450,586.61</b> | <b>698,695.87</b> | <b>295,567.90</b> | <b>399,051.09</b> | <b>636,341.92</b> | <b>310,902.49</b> | <b>419,665.09</b> | <b>651,930.38</b> | <b>290,195.17</b> | <b>374,573.43</b> | <b>611,844.35</b> |

KS1 = Konza Prairie Biological Station, Manhattan, KS; KS2 = Kansas State University Research and Education Center, Hays, KS; WY = USDA Agricultural Research Service High Plains Grasslands Research Station, Cheyenne, WY; MT = USDA Agricultural Research Service Livestock and Range Research Laboratory, Miles City, MT; SD = South Dakota State University Cottonwood Range and Livestock Field Station, Philip, SD; NE = University of Nebraska Gudmundsen Sandhills Laboratory, Whitman, NE.

**Table S11.** Economic and employment impact of rangeland management scenarios at Kansas State University Research and Education Center (KS2) from IMPLAN model

|                     | No Burn           |                   |                   |                   |                   |                   | Spring Burn       |                   |                   |                   |                   |                   |
|---------------------|-------------------|-------------------|-------------------|-------------------|-------------------|-------------------|-------------------|-------------------|-------------------|-------------------|-------------------|-------------------|
|                     | Continuous        |                   |                   | Rotational        |                   |                   | Continuous        |                   |                   | Rotational        |                   |                   |
|                     | Low               | Mod               | High              |
| <b>Employment</b>   |                   |                   |                   |                   |                   |                   |                   |                   |                   |                   |                   |                   |
| Direct              | 1.52              | 1.58              | 1.9               | 1.87              | 1.95              | 2.54              | 1.52              | 1.58              | 1.9               | 1.87              | 1.95              | 2.54              |
| Indirect            | 0.69              | 0.96              | 1.49              | 0.63              | 0.85              | 1.35              | 0.66              | 0.89              | 1.39              | 0.58              | 0.8               | 1.3               |
| Induced             | 0.19              | 0.27              | 0.42              | 0.18              | 0.24              | 0.38              | 0.34              | 0.25              | 0.39              | 0.16              | 0.22              | 0.37              |
| <b>Total</b>        | <b>2.4</b>        | <b>2.81</b>       | <b>3.8</b>        | <b>2.68</b>       | <b>3.04</b>       | <b>4.27</b>       | <b>2.37</b>       | <b>2.72</b>       | <b>3.68</b>       | <b>2.62</b>       | <b>2.97</b>       | <b>4.21</b>       |
| <b>Labor Income</b> |                   |                   |                   |                   |                   |                   |                   |                   |                   |                   |                   |                   |
| Direct              | 20,691.00         | 28,898.00         | 44,811.00         | 18,956.00         | 25,593.00         | 40,811.00         | 19,940.00         | 26,915.00         | 41,811.00         | 18,690.15         | 24,023.00         | 39,241.00         |
| Indirect            | 24,246.13         | 33,862.65         | 52,508.64         | 22,212.64         | 29,989.64         | 47,822.68         | 23,365.00         | 31,538.84         | 48,994.13         | 21,557.52         | 28,150.12         | 45,981.47         |
| Induced             | 6,171.99          | 8,620.00          | 13,366.58         | 5,654.39          | 7,634.11          | 12,173.58         | 5,947.82          | 8,028.46          | 12,471.83         | 5,458.90          | 7,165.83          | 11,705.06         |
| <b>Total</b>        | <b>51,109.12</b>  | <b>71,380.65</b>  | <b>110,686.22</b> | <b>46,823.03</b>  | <b>63,216.75</b>  | <b>100,807.27</b> | <b>49,252.82</b>  | <b>66,482.31</b>  | <b>103,276.95</b> | <b>45,706.58</b>  | <b>59,338.95</b>  | <b>96,927.53</b>  |
| <b>Value Added</b>  |                   |                   |                   |                   |                   |                   |                   |                   |                   |                   |                   |                   |
| Direct              | 41,710.00         | 58,255.00         | 90,332.00         | 38,213.00         | 51,592.00         | 82,270.00         | 40,196.00         | 54,257.00         | 84,286.00         | 37,677.13         | 48,427.00         | 79,104.00         |
| Indirect            | 41,407.15         | 57,830.08         | 89,673.39         | 37,934.38         | 51,215.81         | 81,670.79         | 39,902.37         | 53,861.52         | 83,671.36         | 36,858.36         | 48,074.32         | 78,526.39         |
| Induced             | 12,713.56         | 17,756.18         | 27,533.57         | 11,647.38         | 15,725.37         | 25,076.15         | 12,251.80         | 16,537.69         | 25,690.49         | 11,256.83         | 14,760.76         | 24,111.04         |
| <b>Total</b>        | <b>95,830.71</b>  | <b>133,841.25</b> | <b>207,538.96</b> | <b>87,794.76</b>  | <b>118,533.18</b> | <b>189,016.94</b> | <b>92,350.17</b>  | <b>124,656.20</b> | <b>193,647.85</b> | <b>85,792.32</b>  | <b>111,262.07</b> | <b>181,741.43</b> |
| <b>Output</b>       |                   |                   |                   |                   |                   |                   |                   |                   |                   |                   |                   |                   |
| Direct              | 170,077.00        | 237,535.00        | 368,330.00        | 155,814.00        | 210,367.00        | 335,459.00        | 163,898.00        | 221,234.00        | 343,677.00        | 153,628.84        | 197,463.00        | 322,545.00        |
| Indirect            | 127,628.12        | 178,248.07        | 276,397.85        | 116,924.09        | 157,861.10        | 251,731.65        | 122,989.97        | 166,015.88        | 257,897.95        | 114,495.78        | 148,178.15        | 242,039.76        |
| Induced             | 24,919.61         | 34,803.54         | 53,968.02         | 22,829.81         | 30,822.99         | 49,151.27         | 24,014.52         | 32,415.20         | 50,355.43         | 22,070.55         | 28,932.27         | 47,259.59         |
| <b>Total</b>        | <b>322,624.73</b> | <b>450,586.61</b> | <b>698,695.87</b> | <b>295,567.90</b> | <b>399,051.09</b> | <b>636,341.92</b> | <b>310,902.49</b> | <b>419,665.09</b> | <b>651,930.38</b> | <b>290,195.17</b> | <b>374,573.43</b> | <b>611,844.35</b> |

KS1 = Konza Prairie Biological Station, Manhattan, KS; KS2 = Kansas State University Research and Education Center, Hays, KS; WY = USDA Agricultural Research Service High Plains Grasslands Research Station, Cheyenne, WY; MT = USDA Agricultural Research Service Livestock and Range Research Laboratory, Miles City, MT; SD = South Dakota State University Cottonwood Range and Livestock Field Station, Philip, SD; NE = University of Nebraska Gudmundsen Sandhills Laboratory, Whitman, NE.



**Table S12.** Economic and employment impact of rangeland management scenarios at High Plains Grasslands Research Station (WY) from IMPLAN model

|                     | No Burn           |                   |                   |                   |                   |                   | Spring Burn       |                   |                   |                   |                   |                   |
|---------------------|-------------------|-------------------|-------------------|-------------------|-------------------|-------------------|-------------------|-------------------|-------------------|-------------------|-------------------|-------------------|
|                     | Continuous        |                   |                   | Rotational        |                   |                   | Continuous        |                   |                   | Rotational        |                   |                   |
|                     | Low               | Mod               | High              |
| <b>Employment</b>   |                   |                   |                   |                   |                   |                   |                   |                   |                   |                   |                   |                   |
| Direct              | 1.17              | 1.17              | 1.24              | 1.28              | 1.29              | 1.4               | 1.17              | 1.17              | 1.24              | 1.28              | 1.29              | 1.4               |
| Indirect            | 0.23              | 0.89              | 1.24              | 0.23              | 0.86              | 1.24              | 0.24              | 0.9               | 1.23              | 0.24              | 0.87              | 1.23              |
| Induced             | 0.06              | 0.24              | 0.34              | 0.06              | 0.23              | 0.34              | 0.07              | 0.25              | 0.34              | 0.07              | 0.24              | 0.34              |
| <b>Total</b>        | <b>1.47</b>       | <b>2.3</b>        | <b>2.82</b>       | <b>1.57</b>       | <b>2.38</b>       | <b>2.98</b>       | <b>1.48</b>       | <b>2.31</b>       | <b>2.8</b>        | <b>1.58</b>       | <b>2.4</b>        | <b>2.97</b>       |
| <b>Labor Income</b> |                   |                   |                   |                   |                   |                   |                   |                   |                   |                   |                   |                   |
| Direct              | 7,895.00          | 30,017.00         | 41,815.00         | 7,755.00          | 29,021.00         | 42,042.00         | 8,136.00          | 30,323.00         | 41,478.00         | 8,076.00          | 29,481.00         | 41,590.00         |
| Indirect            | 7,241.47          | 27,532.38         | 38,354.04         | 7,112.70          | 26,618.71         | 38,560.89         | 7,462.15          | 27,813.55         | 38,043.63         | 7,406.98          | 27,040.33         | 38,147.19         |
| Induced             | 2,444.26          | 9,293.11          | 12,945.74         | 2,400.85          | 8,984.73          | 13,015.79         | 2,518.80          | 9,387.92          | 12,841.20         | 2,500.20          | 9,127.08          | 12,876.01         |
| <b>Total</b>        | <b>17,580.73</b>  | <b>66,842.49</b>  | <b>93,114.78</b>  | <b>17,268.55</b>  | <b>64,624.44</b>  | <b>93,618.68</b>  | <b>18,116.95</b>  | <b>67,524.47</b>  | <b>92,362.83</b>  | <b>17,983.18</b>  | <b>65,648.41</b>  | <b>92,613.21</b>  |
| <b>Value Added</b>  |                   |                   |                   |                   |                   |                   |                   |                   |                   |                   |                   |                   |
| Direct              | 20,383.00         | 77,495.00         | 107,955.00        | 20,021.00         | 74,924.00         | 108,450.00        | 21,004.00         | 78,287.00         | 107,083.00        | 20,849.00         | 76,111.00         | 107,374.00        |
| Indirect            | 11,402.55         | 43,352.96         | 60,392.94         | 11,199.78         | 41,914.29         | 60,718.64         | 11,750.00         | 43,795.70         | 59,904.16         | 11,663.16         | 42,578.17         | 60,067.24         |
| Induced             | 5,001.86          | 19,017.15         | 26,491.79         | 4,913.03          | 18,386.09         | 26,635.14         | 5,154.41          | 19,211.17         | 26,277.86         | 5,116.33          | 18,677.40         | 26,349.10         |
| <b>Total</b>        | <b>36,787.41</b>  | <b>139,865.11</b> | <b>194,839.73</b> | <b>36,133.81</b>  | <b>135,224.38</b> | <b>195,893.78</b> | <b>37,908.43</b>  | <b>141,293.87</b> | <b>193,265.02</b> | <b>37,628.49</b>  | <b>137,366.57</b> | <b>193,790.33</b> |
| <b>Output</b>       |                   |                   |                   |                   |                   |                   |                   |                   |                   |                   |                   |                   |
| Direct              | 70,656.00         | 268,635.00        | 374,223.00        | 69,400.00         | 259,721.00        | 376,244.00        | 72,809.00         | 271,379.00        | 371,196.00        | 72,271.00         | 263,835.00        | 372,206.00        |
| Indirect            | 28,700.52         | 109,120.55        | 152,010.62        | 28,190.14         | 105,499.37        | 152,830.43        | 29,575.13         | 110,234.93        | 150,780.35        | 29,356.48         | 107,170.38        | 151,190.82        |
| Induced             | 9,454.49          | 35,946.17         | 50,074.72         | 9,286.60          | 34,753.33         | 50,345.68         | 9,742.85          | 36,312.91         | 49,670.34         | 9,670.88          | 35,303.97         | 49,805.00         |
| <b>Total</b>        | <b>108,811.01</b> | <b>413,701.72</b> | <b>576,308.34</b> | <b>106,876.74</b> | <b>399,973.71</b> | <b>579,420.10</b> | <b>112,126.98</b> | <b>417,926.84</b> | <b>571,646.69</b> | <b>111,298.36</b> | <b>406,309.35</b> | <b>573,201.82</b> |

KS1 = Konza Prairie Biological Station, Manhattan, KS; KS2 = Kansas State University Research and Education Center, Hays, KS; WY = USDA Agricultural Research Service High Plains Grasslands Research Station, Cheyenne, WY; MT = USDA Agricultural Research Service Livestock and Range Research Laboratory, Miles City, MT; SD = South Dakota State University Cottonwood Range and Livestock Field Station, Philip, SD; NE = University of Nebraska Gudmundsen Sandhills Laboratory, Whitman, NE.

**Table S13.** Economic and employment impact of rangeland management scenarios at Fort Keogh Livestock and Range Research Laboratory (MT) from IMPLAN model

|                     | No Burn           |                   |                   |                   |                   |                   | Spring Burn       |                   |                   |                   |                   |                   |
|---------------------|-------------------|-------------------|-------------------|-------------------|-------------------|-------------------|-------------------|-------------------|-------------------|-------------------|-------------------|-------------------|
|                     | Continuous        |                   |                   | Rotational        |                   |                   | Continuous        |                   |                   | Rotational        |                   |                   |
|                     | Low               | Mod               | High              |
| <b>Employment</b>   |                   |                   |                   |                   |                   |                   |                   |                   |                   |                   |                   |                   |
| Direct              | 2.21              | 2.16              | 2.44              | 2.98              | 2.92              | 3.34              | 2.21              | 2.16              | 2.44              | 2.98              | 2.92              | 3.34              |
| Indirect            | 0.37              | 0.46              | 0.57              | 0.37              | 0.43              | 0.53              | 0.38              | 0.46              | 0.57              | 0.34              | 0.4               | 0.5               |
| Induced             | 0.07              | 0.08              | 0.1               | 0.06              | 0.07              | 0.09              | 0.07              | 0.08              | 0.1               | 0.06              | 0.07              | 0.09              |
| <b>Total</b>        | <b>2.65</b>       | <b>2.7</b>        | <b>3.11</b>       | <b>3.41</b>       | <b>3.42</b>       | <b>3.97</b>       | <b>2.65</b>       | <b>2.7</b>        | <b>3.11</b>       | <b>3.38</b>       | <b>3.39</b>       | <b>3.92</b>       |
| <b>Labor Income</b> |                   |                   |                   |                   |                   |                   |                   |                   |                   |                   |                   |                   |
| Direct              | 6,090.63          | 7,495.40          | 9,760.00          | 5,953.00          | 6,961.00          | 8,658.00          | 6,097.00          | 7,511.00          | 9,209.00          | 5,498.00          | 6,460.00          | 8,047.00          |
| Indirect            | 11,565.86         | 14,233.45         | 18,535.22         | 11,305.11         | 13,219.85         | 16,439.84         | 11,577.91         | 14,262.21         | 17,487.59         | 10,439.34         | 12,267.07         | 15,282.55         |
| Induced             | 2,336.15          | 2,874.97          | 3,743.76          | 2,283.43          | 2,670.14          | 3,320.72          | 2,338.59          | 2,880.83          | 3,532.26          | 2,108.69          | 2,477.80          | 3,086.75          |
| <b>Total</b>        | <b>19,992.64</b>  | <b>24,603.82</b>  | <b>32,038.99</b>  | <b>19,541.54</b>  | <b>22,850.99</b>  | <b>28,418.56</b>  | <b>20,013.50</b>  | <b>24,654.05</b>  | <b>30,228.85</b>  | <b>18,046.03</b>  | <b>21,204.87</b>  | <b>26,416.31</b>  |
| <b>Value Added</b>  |                   |                   |                   |                   |                   |                   |                   |                   |                   |                   |                   |                   |
| Direct              | 48,302.36         | 59,442.99         | 77,407.00         | 47,213.00         | 55,210.00         | 68,658.00         | 48,353.00         | 59,564.00         | 73,033.00         | 43,598.00         | 51,231.00         | 63,824.00         |
| Indirect            | 25,155.58         | 30,957.54         | 40,313.83         | 24,588.43         | 28,752.96         | 35,756.40         | 25,181.77         | 31,020.10         | 38,085.25         | 22,705.41         | 26,680.68         | 33,239.32         |
| Induced             | 4,353.89          | 5,358.09          | 6,977.27          | 4,255.65          | 4,976.36          | 6,188.84          | 4,358.44          | 5,369.02          | 6,583.08          | 3,929.97          | 4,617.89          | 5,752.80          |
| <b>Total</b>        | <b>77,811.82</b>  | <b>95,758.62</b>  | <b>124,698.10</b> | <b>76,057.08</b>  | <b>88,939.32</b>  | <b>110,603.24</b> | <b>77,893.21</b>  | <b>95,953.12</b>  | <b>117,651.33</b> | <b>70,233.38</b>  | <b>82,529.57</b>  | <b>102,816.11</b> |
| <b>Output</b>       |                   |                   |                   |                   |                   |                   |                   |                   |                   |                   |                   |                   |
| Direct              | 142,804.96        | 175,741.99        | 228,855.00        | 139,585.00        | 163,227.00        | 202,985.00        | 142,954.00        | 176,098.00        | 215,921.00        | 128,896.00        | 151,463.00        | 188,695.00        |
| Indirect            | 63,781.64         | 78,492.45         | 102,215.20        | 62,343.66         | 72,902.77         | 90,659.90         | 63,848.05         | 78,651.06         | 96,437.89         | 57,569.28         | 67,648.52         | 84,277.86         |
| Induced             | 8,452.53          | 10,402.05         | 13,545.48         | 8,261.80          | 9,660.97          | 12,014.85         | 8,461.36          | 10,423.27         | 12,780.23         | 7,629.55          | 8,965.05          | 11,168.33         |
| <b>Total</b>        | <b>215,039.12</b> | <b>264,636.49</b> | <b>344,615.68</b> | <b>210,190.45</b> | <b>245,790.74</b> | <b>305,659.75</b> | <b>215,263.41</b> | <b>265,172.33</b> | <b>325,139.11</b> | <b>194,094.82</b> | <b>228,076.57</b> | <b>284,141.19</b> |

KS1 = Konza Prairie Biological Station, Manhattan, KS; KS2 = Kansas State University Research and Education Center, Hays, KS; WY = USDA Agricultural Research Service High Plains Grasslands Research Station, Cheyenne, WY; MT = USDA Agricultural Research Service Livestock and Range Research Laboratory, Miles City, MT; SD = South Dakota State University Cottonwood Range and Livestock Field Station, Philip, SD; NE = University of Nebraska Gudmundsen Sandhills Laboratory, Whitman, NE.

**Table S14.** Economic and employment impact of rangeland management scenarios at Cottonwood Range and Livestock Field Station (SD) from IMPLAN model

|                     | No Burn           |                   |                   |                   |                   |                   | Spring Burn       |                   |                   |                   |                   |                   |
|---------------------|-------------------|-------------------|-------------------|-------------------|-------------------|-------------------|-------------------|-------------------|-------------------|-------------------|-------------------|-------------------|
|                     | Continuous        |                   |                   | Rotational        |                   |                   | Continuous        |                   |                   | Rotational        |                   |                   |
|                     | Low               | Mod               | High              |
| <b>Employment</b>   |                   |                   |                   |                   |                   |                   |                   |                   |                   |                   |                   |                   |
| Direct              | 1.35              | 1.41              | 1.58              | 1.56              | 1.69              | 1.95              | 1.35              | 1.41              | 1.6               | 1.58              | 1.69              | 1.95              |
| Indirect            | 0.28              | 0.44              | 0.67              | 0.29              | 0.46              | 0.69              | 0.29              | 0.46              | 0.69              | 0.29              | 0.44              | 0.66              |
| Induced             | 0.1               | 0.17              | 0.25              | 0.11              | 0.17              | 0.26              | 0.11              | 0.17              | 0.26              | 0.11              | 0.17              | 0.25              |
| <b>Total</b>        | <b>1.73</b>       | <b>2.02</b>       | <b>2.5</b>        | <b>1.95</b>       | <b>2.32</b>       | <b>2.9</b>        | <b>1.75</b>       | <b>2.04</b>       | <b>2.55</b>       | <b>1.98</b>       | <b>2.3</b>        | <b>2.86</b>       |
| <b>Labor Income</b> |                   |                   |                   |                   |                   |                   |                   |                   |                   |                   |                   |                   |
| Direct              | 8,573.00          | 13,583.00         | 20,485.00         | 8,818.00          | 14,016.00         | 21,265.00         | 8,900.00          | 14,039.00         | 21,280.00         | 8,862.00          | 13,700.00         | 20,292.00         |
| Indirect            | 9,628.69          | 15,255.73         | 23,007.76         | 9,904.05          | 15,740.82         | 23,883.76         | 9,995.76          | 15,767.12         | 23,900.48         | 9,952.74          | 15,387.02         | 22,790.66         |
| Induced             | 4,632.56          | 7,339.81          | 11,069.44         | 4,765.00          | 7,573.48          | 11,490.91         | 4,809.20          | 7,586.02          | 11,498.99         | 4,788.58          | 7,403.01          | 10,965.07         |
| <b>Total</b>        | <b>22,834.25</b>  | <b>36,178.54</b>  | <b>54,562.20</b>  | <b>23,487.05</b>  | <b>37,330.29</b>  | <b>56,639.68</b>  | <b>23,704.96</b>  | <b>37,392.14</b>  | <b>56,679.47</b>  | <b>23,603.31</b>  | <b>36,490.03</b>  | <b>54,047.73</b>  |
| <b>Value Added</b>  |                   |                   |                   |                   |                   |                   |                   |                   |                   |                   |                   |                   |
| Direct              | 20,151.00         | 31,928.00         | 48,151.00         | 20,728.00         | 32,945.00         | 49,985.00         | 20,919.00         | 32,998.00         | 50,020.00         | 20,829.00         | 32,202.00         | 47,697.00         |
| Indirect            | 16,609.44         | 26,316.05         | 39,688.26         | 17,084.44         | 27,152.82         | 41,199.36         | 17,242.63         | 27,198.20         | 41,228.20         | 17,168.41         | 26,542.53         | 39,313.77         |
| Induced             | 8,078.17          | 12,799.03         | 19,302.70         | 8,309.11          | 13,206.49         | 20,037.65         | 8,386.20          | 13,228.37         | 20,051.73         | 8,350.24          | 12,909.23         | 19,120.69         |
| <b>Total</b>        | <b>44,838.61</b>  | <b>71,043.09</b>  | <b>107,141.95</b> | <b>46,121.56</b>  | <b>73,304.31</b>  | <b>111,222.01</b> | <b>46,547.83</b>  | <b>73,424.57</b>  | <b>111,299.93</b> | <b>46,347.65</b>  | <b>71,653.76</b>  | <b>106,131.46</b> |
| <b>Output</b>       |                   |                   |                   |                   |                   |                   |                   |                   |                   |                   |                   |                   |
| Direct              | 59,314.00         | 93,978.00         | 141,731.00        | 61,011.00         | 96,968.00         | 147,128.00        | 61,575.00         | 97,128.00         | 147,231.00        | 61,310.00         | 94,786.00         | 140,394.00        |
| Indirect            | 42,808.80         | 67,826.41         | 102,291.63        | 44,033.06         | 69,983.09         | 106,186.32        | 44,440.78         | 70,100.05         | 106,260.65        | 44,249.49         | 68,410.13         | 101,326.43        |
| Induced             | 15,049.84         | 23,844.94         | 35,961.43         | 15,480.10         | 24,604.04         | 37,330.67         | 15,623.70         | 24,644.80         | 37,356.90         | 15,556.71         | 24,050.24         | 35,622.35         |
| <b>Total</b>        | <b>117,172.64</b> | <b>185,649.35</b> | <b>279,984.07</b> | <b>120,524.16</b> | <b>191,555.13</b> | <b>290,644.99</b> | <b>121,639.49</b> | <b>191,872.84</b> | <b>290,848.56</b> | <b>121,116.21</b> | <b>187,246.36</b> | <b>277,342.79</b> |

KS1 = Konza Prairie Biological Station, Manhattan, KS; KS2 = Kansas State University Research and Education Center, Hays, KS; WY = USDA Agricultural Research Service High Plains Grasslands Research Station, Cheyenne, WY; MT = USDA Agricultural Research Service Livestock and Range Research Laboratory, Miles City, MT; SD = South Dakota State University Cottonwood Range and Livestock Field Station, Philip, SD; NE = University of Nebraska Gudmundsen Sandhills Laboratory, Whitman, NE.

**Table S15.** Economic and employment impact of rangeland management scenarios at Gudmundsen Sandhills Laboratory (NE) from IMPLAN model

|                     | No Burn           |                   |                   |                  |                   |                   | Spring Burn       |                   |                   |                   |                   |                   |
|---------------------|-------------------|-------------------|-------------------|------------------|-------------------|-------------------|-------------------|-------------------|-------------------|-------------------|-------------------|-------------------|
|                     | Continuous        |                   |                   | Rotational       |                   |                   | Continuous        |                   |                   | Rotational        |                   |                   |
|                     | Low               | Mod               | High              | Low              | Mod               | High              | Low               | Mod               | High              | Low               | Mod               | High              |
| <b>Employment</b>   |                   |                   |                   |                  |                   |                   |                   |                   |                   |                   |                   |                   |
| Direct              | 1.46              | 1.54              | 1.99              | 1.76             | 1.88              | 2.59              | 1.46              | 1.54              | 1.99              | 1.76              | 1.88              | 2.59              |
| Indirect            | 0.13              | 0.19              | 0.39              | 0.13             | 0.19              | 0.36              | 0.14              | 0.2               | 0.4               | 0.13              | 0.2               | 0.36              |
| Induced             | 0.03              | 0.04              | 0.08              | 0.03             | 0.04              | 0.08              | 0.03              | 0.04              | 0.09              | 0.03              | 0.04              | 0.08              |
| <b>Total</b>        | <b>1.62</b>       | <b>1.78</b>       | <b>2.46</b>       | <b>1.92</b>      | <b>2.12</b>       | <b>3.02</b>       | <b>1.62</b>       | <b>1.79</b>       | <b>2.48</b>       | <b>1.92</b>       | <b>2.12</b>       | <b>3.03</b>       |
| <b>Labor Income</b> |                   |                   |                   |                  |                   |                   |                   |                   |                   |                   |                   |                   |
| Direct              | 3,441.44          | 5,162.00          | 10,326.00         | 3,416.00         | 5,171.00          | 9,490.00          | 3,591.00          | 5,369.00          | 10,737.00         | 3,554.00          | 5,220.00          | 9,660.00          |
| Indirect            | 4,911.92          | 7,368.97          | 14,737.94         | 4,875.56         | 7,381.10          | 13,545.24         | 5,124.83          | 7,662.44          | 15,325.07         | 5,072.75          | 7,450.35          | 13,787.61         |
| Induced             | 987.64            | 1,481.57          | 2,963.38          | 980.33           | 1,484.07          | 2,723.52          | 1,030.49          | 1,540.74          | 3,081.39          | 1,019.96          | 1,498.05          | 2,772.27          |
| <b>Total</b>        | <b>9,341.00</b>   | <b>14,012.54</b>  | <b>28,027.32</b>  | <b>9,271.88</b>  | <b>14,036.18</b>  | <b>25,758.76</b>  | <b>9,746.32</b>   | <b>14,573.18</b>  | <b>29,143.46</b>  | <b>9,646.71</b>   | <b>14,168.40</b>  | <b>26,219.88</b>  |
| <b>Value Added</b>  |                   |                   |                   |                  |                   |                   |                   |                   |                   |                   |                   |                   |
| Direct              | 14,447.38         | 21,673.00         | 43,349.00         | 14,341.00        | 21,709.00         | 39,840.00         | 15,074.00         | 22,538.00         | 45,075.00         | 14,921.00         | 21,913.00         | 40,554.00         |
| Indirect            | 10,992.39         | 16,491.02         | 32,982.04         | 10,911.01        | 16,518.17         | 30,312.90         | 11,468.86         | 17,147.77         | 34,295.97         | 11,352.30         | 16,673.14         | 30,855.30         |
| Induced             | 1,960.53          | 2,941.01          | 5,882.50          | 1,946.01         | 2,945.98          | 5,406.36          | 2,045.59          | 3,058.47          | 6,116.77          | 2,024.69          | 2,973.72          | 5,503.14          |
| <b>Total</b>        | <b>27,400.30</b>  | <b>41,105.04</b>  | <b>82,213.54</b>  | <b>27,198.02</b> | <b>41,173.16</b>  | <b>75,559.26</b>  | <b>28,588.45</b>  | <b>42,744.24</b>  | <b>85,487.74</b>  | <b>28,297.99</b>  | <b>41,559.87</b>  | <b>76,912.43</b>  |
| <b>Output</b>       |                   |                   |                   |                  |                   |                   |                   |                   |                   |                   |                   |                   |
| Direct              | 64,242.00         | 96,376.00         | 192,755.00        | 63,767.00        | 96,535.00         | 177,155.00        | 67,027.00         | 100,216.00        | 200,433.00        | 66,346.00         | 97,441.00         | 180,326.00        |
| Indirect            | 32,779.35         | 49,176.31         | 98,352.63         | 32,536.69        | 49,257.28         | 90,393.23         | 34,200.19         | 51,134.73         | 102,270.77        | 33,852.61         | 49,719.40         | 92,010.65         |
| Induced             | 3,618.42          | 5,428.04          | 10,856.94         | 3,591.63         | 5,437.20          | 9,978.16          | 3,775.42          | 5,644.82          | 11,289.32         | 3,736.84          | 5,488.41          | 10,156.78         |
| <b>Total</b>        | <b>100,639.42</b> | <b>150,980.35</b> | <b>301,964.57</b> | <b>99,895.32</b> | <b>151,229.49</b> | <b>277,526.39</b> | <b>105,002.61</b> | <b>156,995.55</b> | <b>313,993.09</b> | <b>103,935.46</b> | <b>152,648.81</b> | <b>282,493.43</b> |

KS1 = Konza Prairie Biological Station, Manhattan, KS; KS2 = Kansas State University Research and Education Center, Hays, KS; WY = USDA Agricultural Research Service High Plains Grasslands Research Station, Cheyenne, WY; MT = USDA Agricultural Research Service Livestock and Range Research Laboratory, Miles City, MT; SD = South Dakota State University Cottonwood Range and Livestock Field Station, Philip, SD; NE = University of Nebraska Gudmundsen Sandhills Laboratory, Whitman, NE.
